# Supplementary material for: Effects of magnesium ion on kinetic stability and spin distribution of phenoxyl radical derived from a vitamin E analogue: mechanistic insight into antioxidative hydrogen-transfer reaction of vitamin EElectronic supplementary information available: calculated spin density distributions and dependence of kHT on [Mg2+] for hydrogen transfer. See http://www.rsc.org/suppdata/p2/b2/b205380b/
Source: Royal Society of Chemistry journal article supplement (doi:10.1039/b205380b), 2002-07-15
Supplement: b205380b.doc [file b205380b.doc]

**Supplementary Data**

**Fig. S1.** Spin density distribution of (a) **1**• and (b) Mg2+–**1**• calculated by using the ADF method.

**Fig. S2.** Dependence of *k*HT on [Mg2+] for hydrogen transfer from **1H** to DPPH• (white circles) and G• (black circles) in the presence of Mg(ClO4)2 in deaerated MeCN at 298 K.
